# Supplementary material
Source: PubMed Central journal article supplement (PMC3277678)

**Figure S1: Structures of various compounds used.**

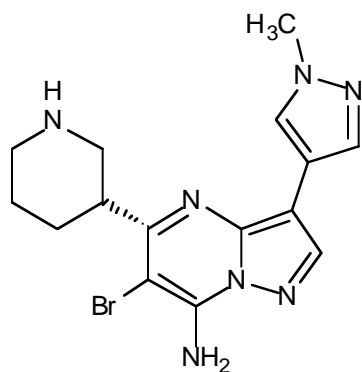

**SCH900776**

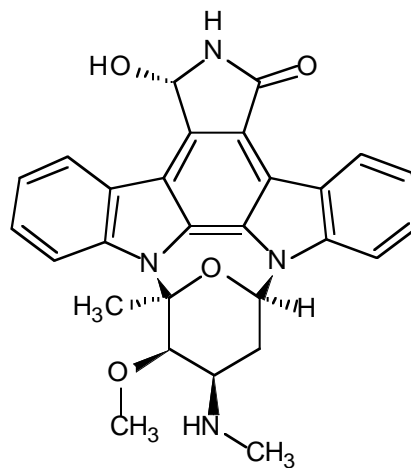

**UCN-01**

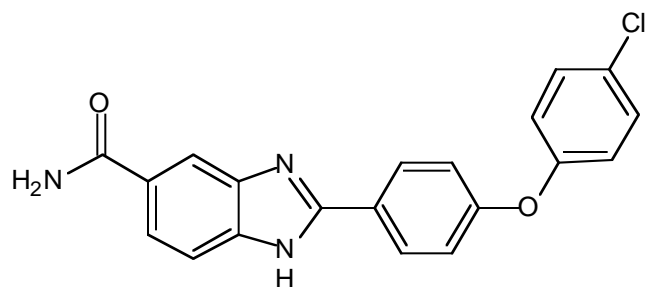

**"2h"**

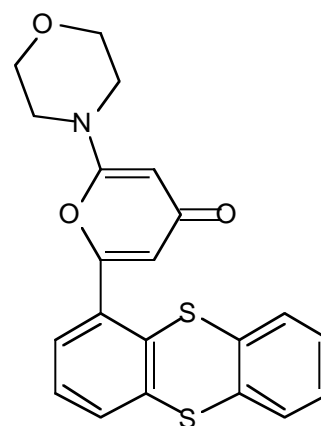

**KU55933**

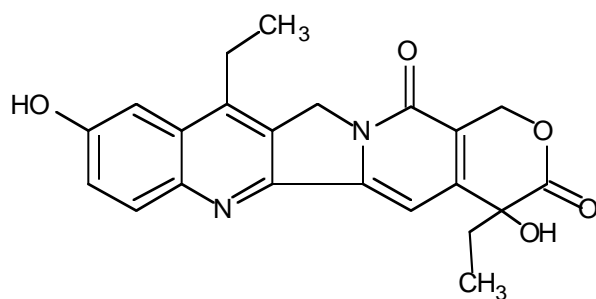

**SN38**

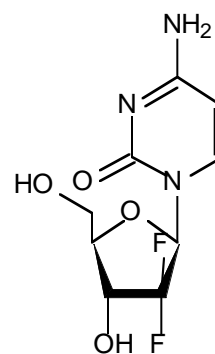

**gemcitabine**

Supplement: NIHMS346453-supplement-1.pdf [file NIHMS346453-supplement-1.pdf]
